# Supplementary material
Source: PubMed Central journal article supplement (PMC11488036)
Supplement: NIHPP2024.06.30.601440v2-supplement-1.pdf [file NIHPP2024.06.30.601440v2-supplement-1.pdf]

*Emura et al.,*

*“The evolutionary modifications of a GoLoco motif in the AGS protein facilitate micromere formation in the sea urchin embryo”*

## Supplementary Figures and Legends

Supplemental Figure S1

A

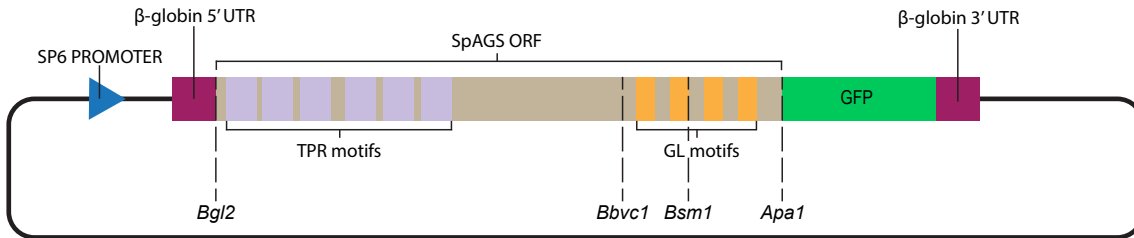

B

*S. purpuratus* AGS Protein Sequence

TPR1 TPR2  
 MQSEASCMELALEGERLCKAGNCREGVRYLEAAVEVGTDDLKLSAIYSQLGNAYFYLEDYGKALTYHKHDL

TPR3 117aa, before here removed in 1F  
 TLATSIGDRLGEAKASGNIGNTLKVLGKFDEAICCCQRHLDISRELSEKVGEGRALYNLGNVYHAKGKHAGRS

TPR4  
 GHQDPGDFPQEVTDCLKQAIQFYEANLAIVRELGDRAAQGRACGNLGNTHYLLGNFETAIQFHTERLAIKE

222aa, before here removed in 2F TPR5 TPR6  
 FGDKA AERRAYSNLGNACVFMVQFEVAAKYKSLHIARQLGELAMEAQACYSLGNTYLLREYKAVEYHS

301aa, before here removed in 3F  
 RHMEIAQQLNDRVGEGRACWSLGNHAHTSLGNHEKALHYATLHLQISREVDRTGEVTAKMNLQDLQTLFG

ISTADLSEVSTTVQTPLQESKGARPRRRSMENLELVAMTPEKTEIVQVPRKIRPGSKLKLKNGGESKDKQS

BbvC1 RE site GL1 (removed in Δ1)  
 HKDSKESVSSAKNSVPAPSAKASQTSARKGGEPQMLDDADNFFEALSRFQSNRMDEQRCSFGRLQKKLAD

GL2 (removed in Δ2) Bsm1 RE site GL3 (removed in Δ3)  
 EEGNGLPEKEELLDEIAKLQGSRLNEQRAF SVKRLPGLPLRANEDVVGKLLAKGERAEPD DDFEMIIIRCQG

GL4 (removed in Δ4)  
 ARIEDQRSTLPIQAPAPTVPDEDFFSLIQRIQSKRIEEQRSIAPWEKSGTSCVCFYDYDTSRTEGTACCVYSRP

659aa  
 VQESHL

**Supplemental Figure 1. Dissection of SpAGS motifs.** **A**, The construct design of SpAGS-GFP, including the restriction enzyme sites used to prepare SpAGS mutants. **B**, The protein sequence of SpAGS. Predicted domains are labeled based on NCBI blast results, and the sequence portions deleted for each N-terminal construct are marked. The sequences for each GL motif used for deletion or swapping are indicated in orange. The internal restriction enzyme sites for *BbvCI* and *BsmI* are shown in green.

Supplemental Figure 2 Echinoderm AGS sequence alignment

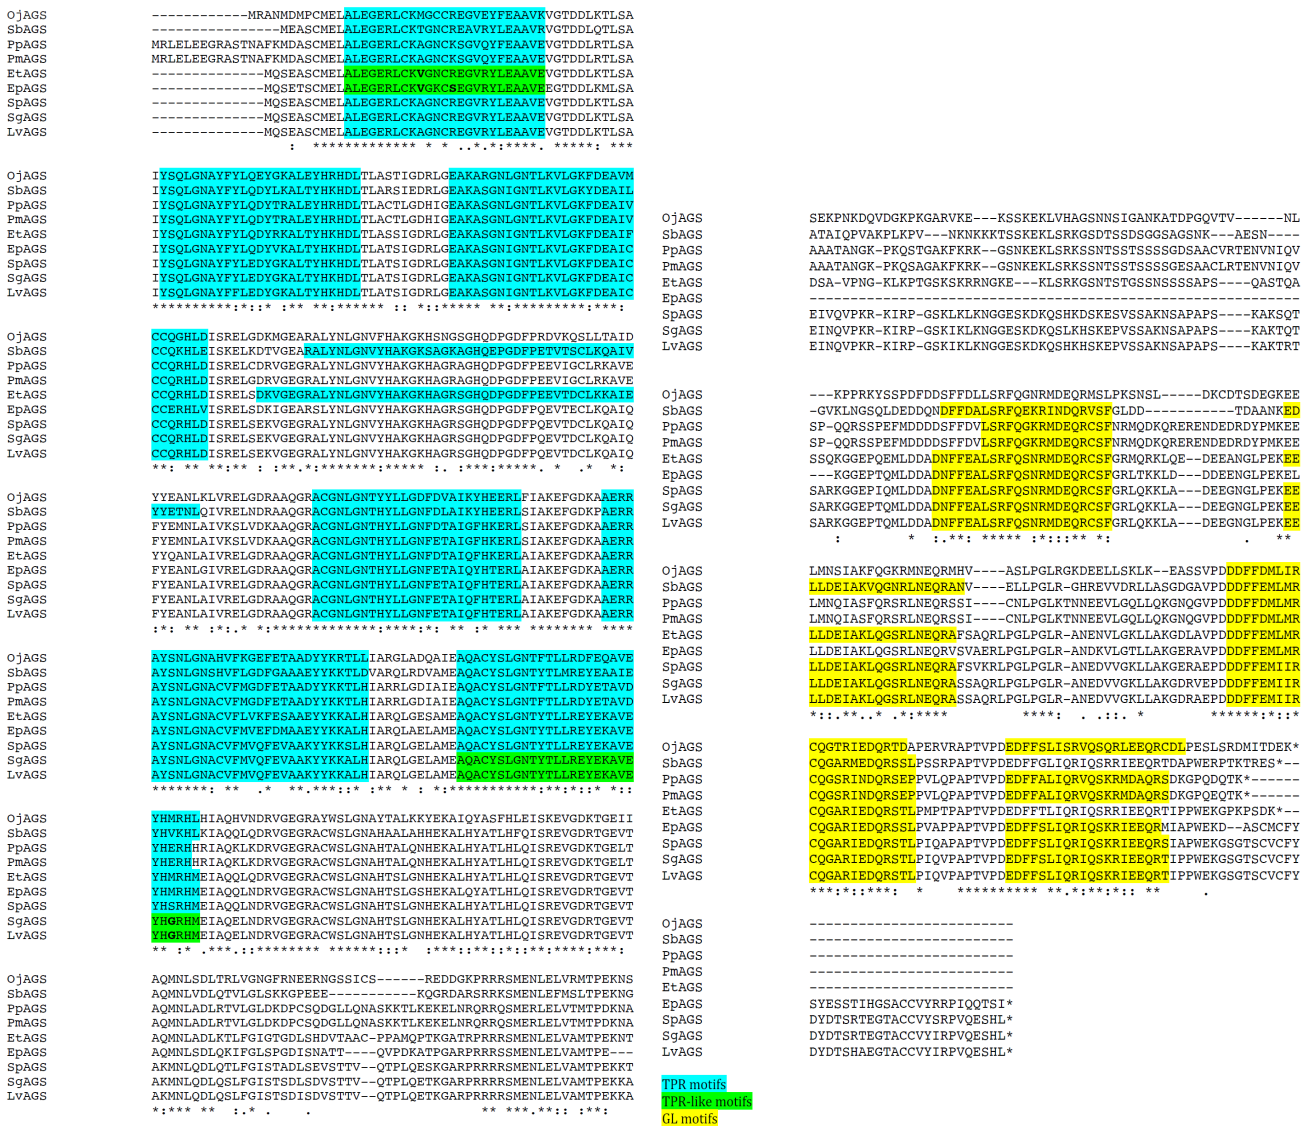

**Supplemental Figure 2. Echinoderm AGS sequence alignment.** All AGS are similar in the N-terminus with the predicted conserved TPR motifs (blue) but are highly variable in the C-terminus with the predicted GL motifs (yellow).

### Supplemental Figure 3

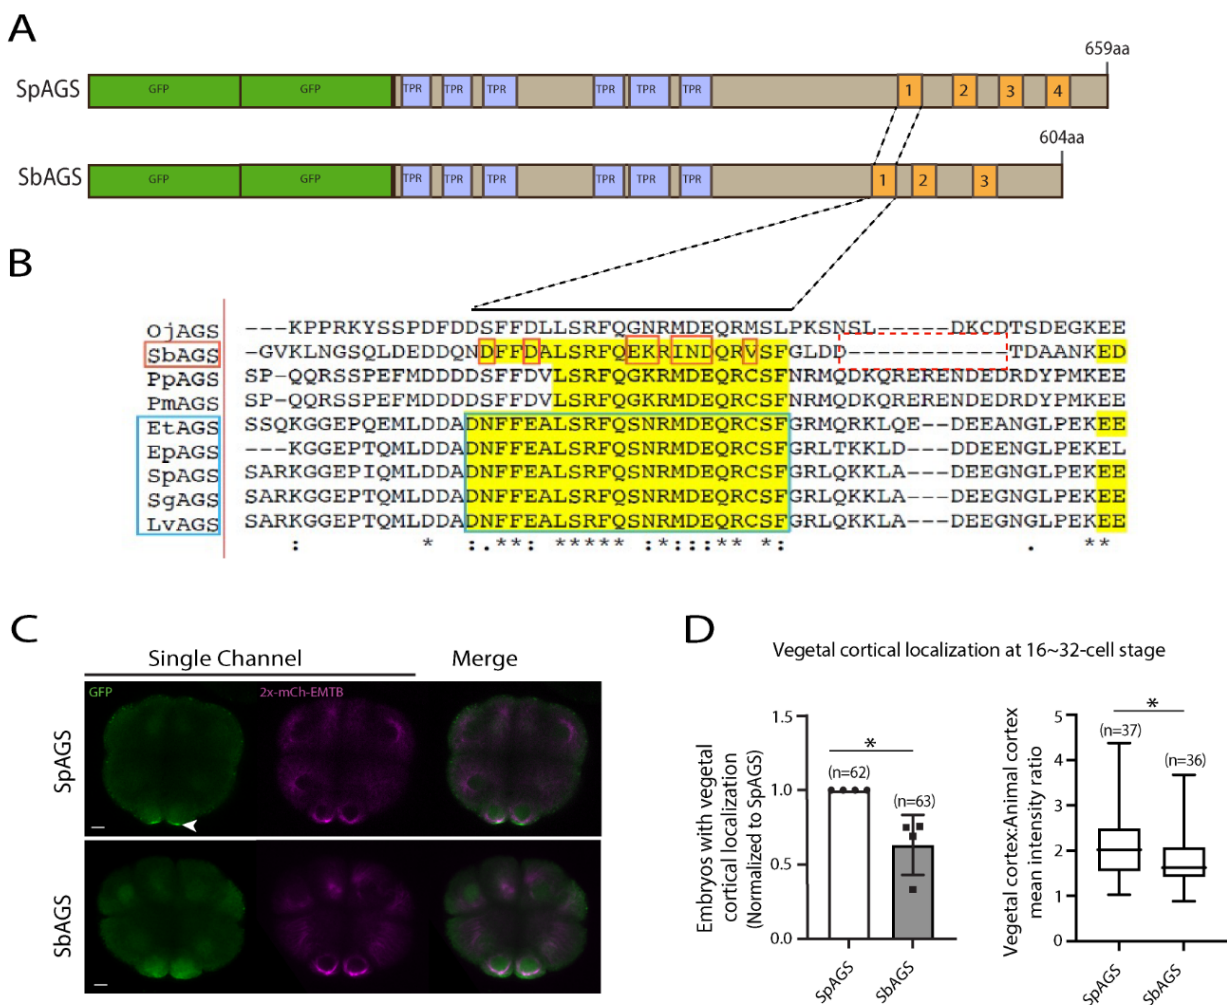

**Supplemental Figure 3. SbAGS does not fully localize at the vegetal cortex.** **A**, Design of 2XGFP-AGS constructs that contain AGS orthologs from two different species tested in this study, namely, *S. purpuratus* (Sp; sea urchin), and *S. briareus* (Sb; sea cucumber). TPR motifs are marked in blue, and GL motifs are in orange. **B**, Alignment of GL1 motif sequences among echinoderms. **C**, Single Z-slice confocal images of sea urchin (Sp) or sea cucumber (Sb) embryos at 16-cell stage showing localization of 2x-GFP-AGS. Embryos were injected with 0.2-0.3 $\mu$ g/ $\mu$ l stock of GFP-AGS mRNA and 0.25 $\mu$ g/ $\mu$ l stock of 2x-mCherry-EMTB mRNA. The white arrowhead indicates vegetal cortical localization of GFP-AGS. **D**, Left graph, the number of embryos with vegetal cortical localization of 2x-GFP-AGS in 16~32-cell embryos was scored and normalized to that of the control group (SpAGS). Right graph, the ratio of the vegetal cortex-to-animal cortex mean intensity. Statistical analysis was performed against the control (SpAGS) by *t*-test. *n* indicates the total number of embryos scored. \* represents *p*-value < 0.05. Each experiment was performed at least two independent times. Error bars represent standard error. Scale bars=10 $\mu$ m.

Supplemental Figure 4 SpAGS, EtAGS and PmAGS linker domain sequence alignment

A

Yellow, CK1 ; Blue, Aurora ; Green, CMGC/CDK

PmAGS GDKTGE<sup>Y</sup>LTQMNLADLR<sup>Y</sup>TVLGLDKDPC<sup>Y</sup>SDGLLQNA<sup>Y</sup>SK<sup>Y</sup>TKLKEKELN<sup>Y</sup>R<sup>Y</sup>QR<sup>Y</sup>RS<sup>Y</sup>ME<sup>Y</sup>RLELV  
 SpAGS GDRTGE<sup>Y</sup>VTA<sup>Y</sup>MN<sup>Y</sup>LQDL<sup>Y</sup>QL<sup>Y</sup>TLFGI<sup>Y</sup>STADL<sup>Y</sup>SEV<sup>Y</sup>ST<sup>Y</sup>--V<sup>Y</sup>Q<sup>Y</sup>PL<sup>Y</sup>QE<sup>Y</sup>SK<sup>Y</sup>GAR<sup>Y</sup>PR<sup>Y</sup>RR<sup>Y</sup>RS<sup>Y</sup>ME<sup>Y</sup>NLELV  
 EtAGS GDRTGE<sup>Y</sup>VTA<sup>Y</sup>MN<sup>Y</sup>LADL<sup>Y</sup>KTL<sup>Y</sup>FGI<sup>Y</sup>TGDL<sup>Y</sup>SHD<sup>Y</sup>V<sup>Y</sup>TAA<sup>Y</sup>--CPP<sup>Y</sup>AM<sup>Y</sup>Q<sup>Y</sup>PK<sup>Y</sup>GAT<sup>Y</sup>PR<sup>Y</sup>RR<sup>Y</sup>RS<sup>Y</sup>ME<sup>Y</sup>NLELV  
 \*\*:\*\*\*:\*\*\*:\*\*\* \*\*:\*\*\*:\*\*\* \* \*\*:\*:\*\*\*:\*\*\*

PmAGS **TM**TPDKNAAATANGKPKQSAGAKFKRK--GSNKEKLSRKSSNTSS<sup>Y</sup>SSSSGESAACLRT  
 SpAGS **AM**TP<sup>Y</sup>E<sup>Y</sup>KT<sup>Y</sup>EIV<sup>Y</sup>Q<sup>Y</sup>VP<sup>Y</sup>K<sup>Y</sup>R<sup>Y</sup>K<sup>Y</sup>IRP<sup>Y</sup>--GSKL<sup>Y</sup>KL<sup>Y</sup>K<sup>Y</sup>NG<sup>Y</sup>GES<sup>Y</sup>K<sup>Y</sup>DK<sup>Y</sup>Q<sup>Y</sup>SH<sup>Y</sup>K<sup>Y</sup>DS<sup>Y</sup>KE<sup>Y</sup>SV<sup>Y</sup>SS<sup>Y</sup>AK<sup>Y</sup>NS<sup>Y</sup>VP<sup>Y</sup>AP<sup>Y</sup>SK<sup>Y</sup>AK  
 EtAGS **AM**TP<sup>Y</sup>E<sup>Y</sup>KN<sup>Y</sup>T<sup>Y</sup>DS<sup>Y</sup>AV<sup>Y</sup>--PNG<sup>Y</sup>KL<sup>Y</sup>K<sup>Y</sup>PT<sup>Y</sup>G<sup>Y</sup>SK<sup>Y</sup>K<sup>Y</sup>RR<sup>Y</sup>NG<sup>Y</sup>KE<sup>Y</sup>---KLS<sup>Y</sup>R<sup>Y</sup>K<sup>Y</sup>G<sup>Y</sup>NT<sup>Y</sup>ST<sup>Y</sup>G<sup>Y</sup>SS<sup>Y</sup>NS<sup>Y</sup>SS<sup>Y</sup>SS<sup>Y</sup>AP<sup>Y</sup>S<sup>Y</sup>Q<sup>Y</sup>AS  
 :\*\*\*:\*\*\*: . : \*:\* \* : . \*:\*: \* \* \* : . \* . .

B

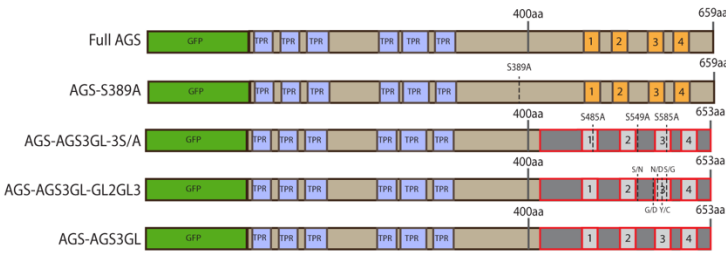

E

Micromere formation at 16~32-cell stage

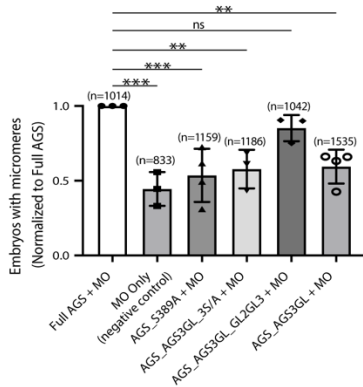

F

Development at 2 dpf

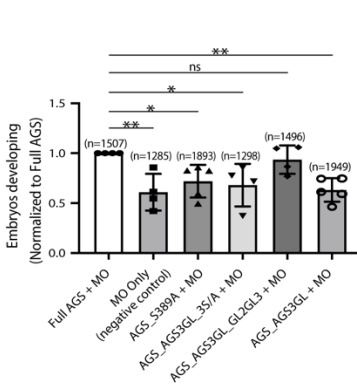

C

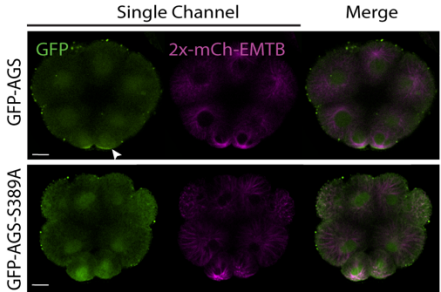

D

Vegetal cortical localization at 16~32-cell stage

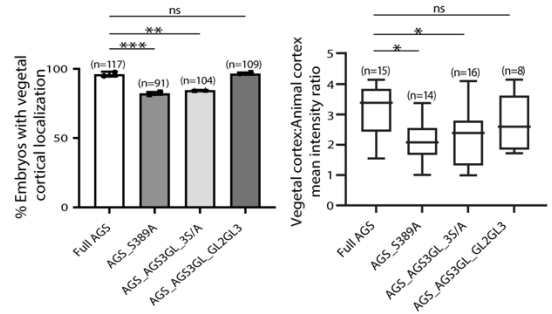

G

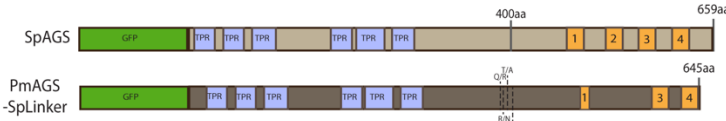

H

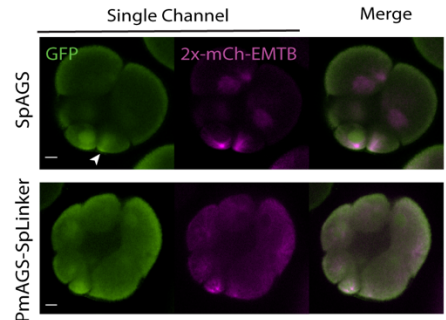

I

Vegetal cortical localization at 16~32-cell stage

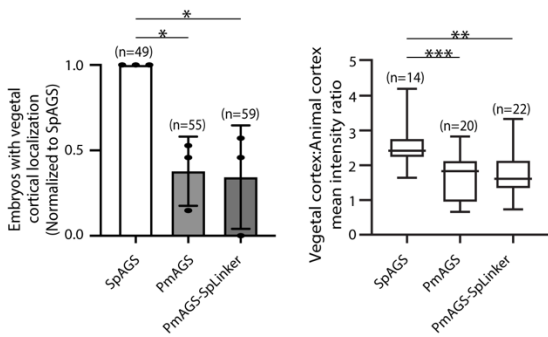

J

Micromere formation at 16~32-cell stage

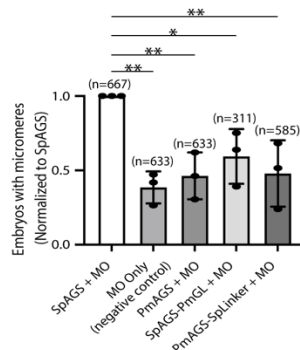

K

Development at 2 dpf

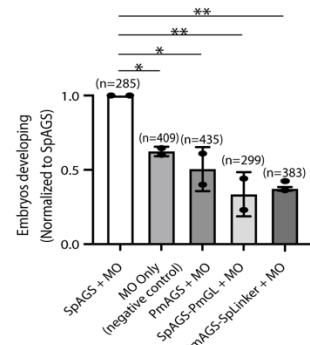

**Supplemental Figure 4. The linker domain and GL2-GL3 regions are important for AGS localization and function.** **A**, Alignment of linker domain between echinoderms including sea urchin (SpAGS), pencil urchin (EtAGS), and sea star (PmAGS). Bold letters represent the conserved core linker domain. The yellow, blue, or green highlights indicate the CK1, Aurora, or CMGC/CDK phosphorylation sites predicted by GPS 6.0. The red letters indicate PmAGS amino acids mutated to those of SpAGS to construct the PmAGS-SpLinker mutant. **B**, Design of GFP-AGS mutant constructs tested in this study. TPR motifs are marked in blue, and GL motifs are in orange. The brown section indicates the SpAGS sequence, and the red and grey boxes show the non-sea urchin (non-SpAGS) introduced at the C-terminus. The dotted lines represent single amino acid mutations. **C**, Single z-slice confocal images of sea urchin embryos at 8~16-cell stage showing localization of GFP-AGS-S389A mutant. Embryos were injected with 0.3 $\mu$ g/ $\mu$ l stock of GFP-AGS mRNA and 0.25 $\mu$ g/ $\mu$ l stock of 2x-mCherry-EMTB mRNA. The white arrowhead indicates vegetal cortical localization of GFP-AGS. **D**, % of the embryos with vegetal cortical localization of GFP-AGS mutants (left) and the ratio of the vegetal cortex-to-animal cortex mean intensity (right) in 16~32-cell embryos. Statistical analysis was performed against Full AGS by One-Way ANOVA. **E-F**, Embryos were injected with 0.15 $\mu$ g/ $\mu$ L stock of GFP-AGS mRNAs and 0.75mM SpAGS MO. The number of embryos forming micromeres (E) and developing to gastrula or pluteus stage (F) were scored, and each of which was then normalized to that of the Full AGS. Statistical analysis was performed by One-Way ANOVA. **G**, Design of GFP-AGS constructs tested in this study from *S. purpuratus* (Sp) and *P. miniata* (Pm). TPR motifs are marked in blue, and GL motifs are in orange. The dotted lines represent single amino acid mutations. **H**, Single Z-slice confocal images of sea urchin embryos at 8~16-cell stage showing localization of GFP-AGS. Embryos were injected with 0.3 $\mu$ g/ $\mu$ l stock of GFP-AGS mRNAs and 0.25 $\mu$ g/ $\mu$ l stock of 2x-mCherry-EMTB mRNA. The white arrowhead indicates vegetal cortical localization of GFP-AGS. **I**, The number of embryos with vegetal cortical localization of GFP-AGS mutants in 16~32-cell embryos was scored and normalized to that of the SpAGS (left graph). Right graph shows the ratio of the vegetal cortex-to-animal cortex mean intensity. Statistical analysis was performed against SpAGS by One-Way ANOVA. **J-K**, Embryos were injected with 0.3 $\mu$ g/ $\mu$ l stock of GFP-AGS mRNAs and 0.75mM SpAGS MO. The number of embryos making micromeres (J) and developing to gastrula or pluteus stage (K) were scored and normalized to that of the SpAGS. Statistical analysis was performed by One-Way ANOVA. n indicates the total number of embryos scored. \* represents p-value<0.05, \*\* p-value < 0.01, and \*\*\* p-value < 0.001. Each experiment was performed at least two independent times. Error bars represent standard error. Scale bars=10 $\mu$ m.

Supplemental Figure S5 GoLoco Domain sequence alignment

```

SpAGS_GL 461 RKGGEPIQMLDDADNFFEALSRFQSNRMDEQRCSEFGRLQKKLA-----
DmPins_GL 455 EKLRQAQATRKAKDDFFEMLSRFSQSRMDDQRCSEIKVNPAGAPAVATGATRKPL----
PmAGS_GL 479 PQQRSSEPEFMDDDDSFFDVLSRFQGKRMDEQRCSEFNRMQDKQRERE-----
EtAGS_GL 459 QKGGEPQEMLLDADNFFEALSRFQSNRMDEQRCSEFGRMQRKLE-----
HsLGN_GL 468 NSQRKISADTIGDEGFFDLLSRFQSNRMDDQRCCLQEKNCHTASTTTSTPPKMLKT
HsAGS3_GL 460 PRTSIPRAPSSDEECFFDLLTKFQSSRMDDQRCPLDDGQAGAAEATAAPTLEDRI--A
      : **: **: *..***:*** :

SpAGS_GL DEENGLPEKELLDEIAKLQSRLNEQRAFSVKRPLPGLPGLR-ANE---DVVGK---LL
DmPins_GL -----VQQNSLFVDPTNLPGLKSPSSANPSAIGHGPLAR
PmAGS_GL NDEDRDYPMKEELLNQIASFQSRLNEQRSS----ICNLPGLKTNNE---EVLGQ---LL
EtAGS_GL DEEANLPEKELLDEIAKLQSRLNEQRAFSQRLPGLPGLR-ANE---NVLGK---LL
HsLGN_GL SSVPVVSPNTDEFFLDLLASSQSRLLDDQRAS----FSNLPGLRLTQNSQ-SVLS----HL
HsAGS3_GL QPSMTASPQTEEFFDLLIASSQSRLLDDQRAS----VGLPGLRITHSNA-GHLR---G-
      *: .****: . :

SpAGS_GL AKGERAEPDDFFEMIRCOGARIEDQRSTLP-I-----
DmPins_GL SATTTQPDDFFLDMLMRCQGSRLEEQRSELPRPNVTMDAEAEAPPRSVPEAAVPGAPRG
PmAGS_GL QKGNQGVPDDFFDLMLMRCQGSRINDQRSEPP-V-----
EtAGS_GL AKGDLAVPDDFFEMLMRCQARIEDQRSTLP-M-----
HsLGN_GL MTNDNKEADEDEFFDILVKCQSRLDDQRCAPPPA-----
HsAGS3_GL -HGEPQEPDDEFFFMLIKIQSSRIDDQRCPPPDV-----
      .:****:****: *

SpAGS_GL -QAPAPTVPDEFFSLIQRIQSKRIEEQRSIAPWEKGSGT-----SCVCFYDYDTSR
DmPins_GL QTGRGATVPDEFFSLIMKVQSGRMEDQRASIPFRNANNNSRS-----NNNG
PmAGS_GL -LQPAPTVPDEFFFALIQRVQSKRMDAQRSDKGPQEQTKT-----SD-----
EtAGS_GL -PTPAPTVPDEFFFTLIQRIQSRRIEEQRTIPPWEKGPKP-----SDK-----
HsLGN_GL -TTKGPTVPDEFFSLILRSQGKRMDEQRVLLQRDQNRDTDFGLKDFLQNNALLEFKNSG
HsAGS3_GL -LPRGPTMPDEFFSLIQRVQAKRMDEQRVDLAGGPEQGAGPPEPQQC-----QPG
      .:*****:***:*.*:**

SpAGS_GL TEGTACCVYSRPVQESL
DmPins_GL SAGGAGK-----
PmAGS_GL -----
EtAGS_GL -----
HsLGN_GL KKSADH-----
HsAGS3_GL AS-----

```

**Supplemental Figure 5. Alignment of C-terminus GoLoco domain sequences used for chimeric mutants.** Sea urchin *S. purpuratus* (SpAGS\_GL), *Drosophila* (DmPins\_GL), sea star *P. miniata* (PmAGS\_GL), pencil urchin *E. tribuloides* (EtAGS\_GL), human *H. sapiens* LGN (HsLGN\_GL) and human *H. sapiens* AGS3 (HsAGS3\_GL). Bold letters indicate GoLoco motif sequences. The green highlight indicates additional serine amino acid present uniquely in HsAGS3\_GL and mutated to Alanine in AGS\_AGS3GL\_3S/A mutant. The highlighted amino acids between GL2 and GL3 and within GL3 are those mutated to match HsLGN\_GL in AGS\_AGS3GL\_GL2GL3 mutant.

## Supplemental Figure 6

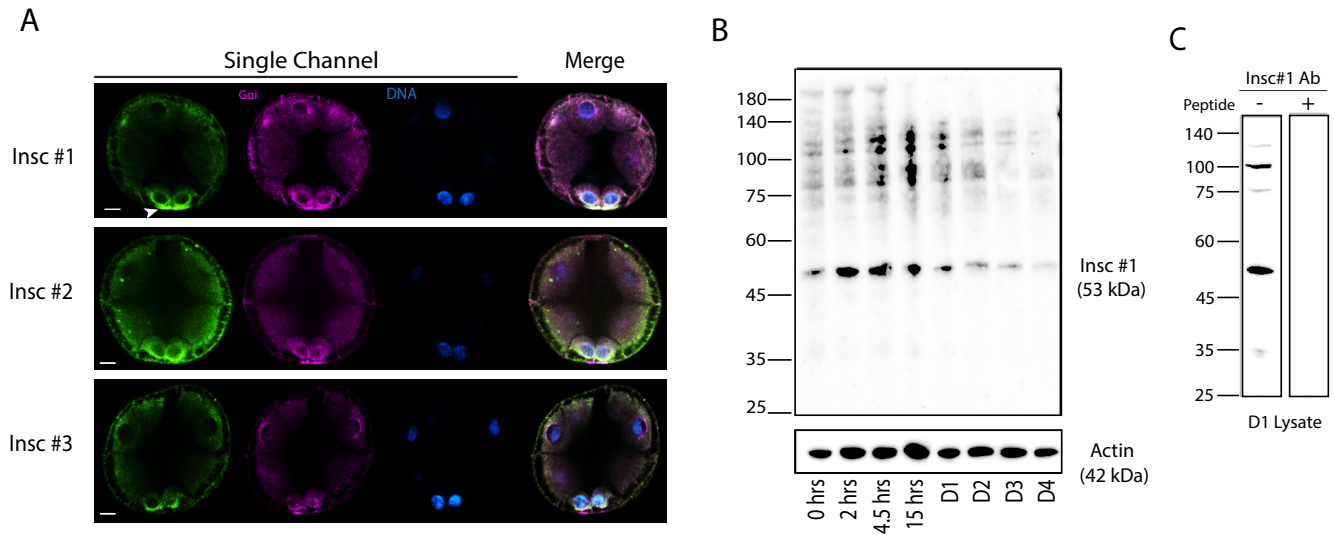

**Supplemental Figure 6. Insc protein expression during embryonic development.** **A**, Endogenous Insc protein localization by immunofluorescence. Embryos were stained with three Insc antibodies (green) designed for different Insc amino acid sequence sections. Embryos were stained with Gai antibody (magenta) and Hoechst dye (blue). During the 16-cell stage, all antibodies show signal enriched at the vegetal pole. With #2 and #3 antibodies, some non-specific cortex signals were also observed around the entire embryo. **B**, Insc immunoblot analysis. Embryos were collected at 0, 2, 4.5, 15, 24, 48, 72, and 96 hours post fertilization and subjected to immunoblot with Insc #1 antibody. Actin (42kDa) was used as a loading control. The expected size of Insc is 53kDa. **C**, Peptide competition assay with Insc #1 antibody. The 24-hour lysate was used. Each experiment was performed at least two independent times. Scale bars=10 $\mu$ m.

Supplemental Figure S7

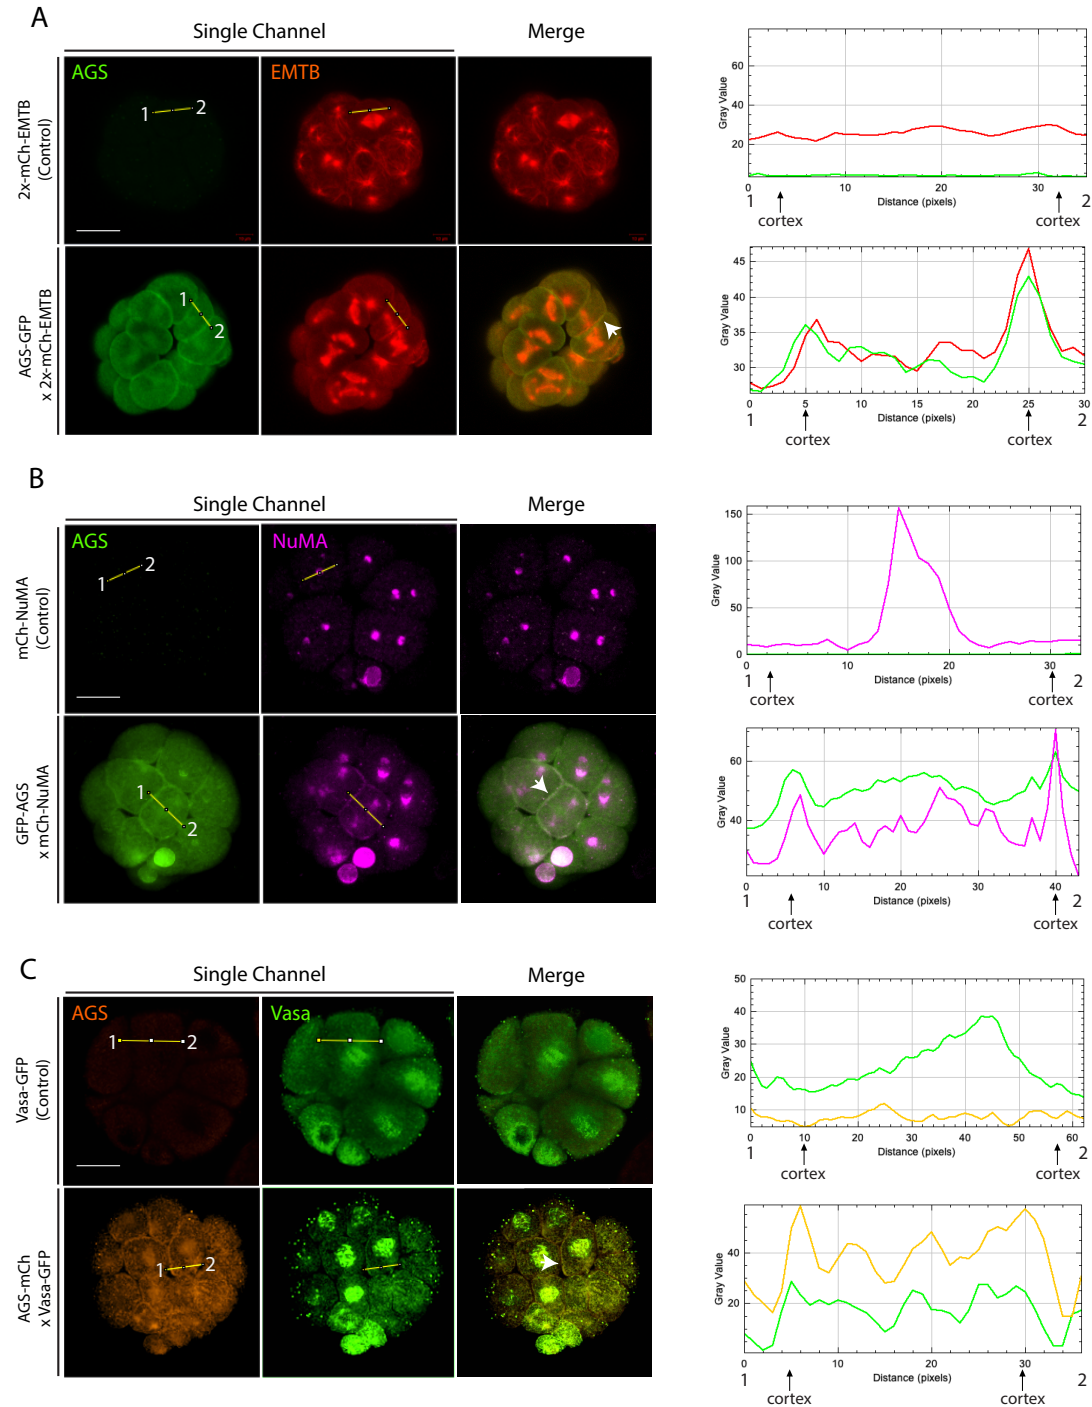

**Supplemental Figure 7. SpAGS colocalizes with micromere-specific fate determinants.** **A**, Embryos were co-injected with 2x-mCherry-EMTB (0.5 $\mu$ g/ $\mu$ l stock) mRNA with or without GFP-AGS (0.5 $\mu$ g/ $\mu$ l stock) mRNA. **B**, Embryos were co-injected with mCherry-NuMA (0.15 $\mu$ g/ $\mu$ l) mRNA with or without GFP-AGS (0.5 $\mu$ g/ $\mu$ l stock). **C**, Embryos were co-injected with Vasa-GFP (1 $\mu$ g/ $\mu$ l stock) mRNA with or without AGS-mCherry (0.5 $\mu$ g/ $\mu$ l stock) mRNA. The intensity of each signal, from one cortex to the other, was measured and plotted from point 1 to 2 on the corresponding graph (right) using *ImageJ*. White arrows indicate the cortical colocalization of each construct. All images represent over 50% of the embryos observed (n=30 or larger) per group. Scale bars=20 $\mu$ m.



### Supplemental Figure 8 Sea urchin SpDlg and sea star PmDlg sequence alignment

|       |                                                                                                                         |     |
|-------|-------------------------------------------------------------------------------------------------------------------------|-----|
| SpDlg | -----                                                                                                                   | 0   |
| PmDlg | MN NIEEWEYEDIIILNRGGAGLGFSIAGGVNDNPHVPDDPSIFITKLI PGGAAAVGGRRLRLM                                                       | 60  |
| SpDlg | -----MVLRRWPRNPSTGK TLSIELIKGSKGLGFS                                                                                    | 30  |
| PmDlg | DV IIRVNETEIHNVPHQNAVDALKKTGSIVNLVVRRRRQRRRTGDVIRIKLVKGT KGLGFS                                                         | 120 |
|       | : : * * : * * . . : * : * * : * * * * * * *                                                                             |     |
| SpDlg | IAGGCGNQHVPGDNGIFVTKIIDGGAEQDGR LQVGDKITAVGDN N LVEVTHE DAVAVLK                                                         | 90  |
| PmDlg | IAGGCGNQHVAGDNGIFVTKIIDGGAQM DGNLQIGDKIIAVGNDKLEEVTHE NAVAVLK                                                           | 180 |
|       | **** * * * * * * * * * * * * * * * : * * : * * * * * * * * * * * * * * * *                                              |     |
| SpDlg | ATSNR VLLTVIKNATLLAGTQMAPYSQNDENAQP PDVSNVDMSAANPVYAT-----                                                              | 141 |
| PmDlg | ATSEVVLLTVIKGAVISYSPSPAS I-----TSQPDVSTMQSSPPPPYPEAIVSSVAGV                                                             | 234 |
|       | *** : * * * * * * * . : : * : : * * * * * * * : * : * * *                                                               |     |
| SpDlg | --MQPTLMQEPRSSDLQELDGAFGTNVAFGT N VANGANGANGSNGEPPSYNRVTNSQPP                                                           | 198 |
| PmDlg | SLQSEPAL-QRPTPPHQEMSMMNPLTYHQPPQDTAYGSM-----KMKHVPPSP                                                                   | 284 |
|       | : * : * * * : * * . . : : : * * : : : * * *                                                                             |     |
| SpDlg | NAFNNTPAKIFIQNDDGIPREPRQVVLNKGATGLGFNIVGGEDGEGIFISFILAGGVAD                                                             | 258 |
| PmDlg | TANYEGNGVKPVQVNDDFPREARTVVLNKGATGLGFNIVGGEDGEGIFISFILAGGVAD                                                             | 344 |
|       | . * : . * : * * * * * * * * * * * * * * * * * * * * * * * * * * * * * * * * * * * * * *                                 |     |
| SpDlg | L S G A L R R G D Q I L A V N S K D L V N A T H E D A A L A L K G A G Q V V T I D A Q Y K P E E Y N C F E A K I Q S L R | 318 |
| PmDlg | L S G E L K R G Q I L S V N K K D L R G A T H E D A A L A L K G T G Q T V L I E A Q Y K P E E Y N R F E A K I Q S L R   | 404 |
|       | *** : * * * * * * * * * * * * * * * * * * * * * * * * * * * * * * * * * * * * * * * * * * * * * * * * * * * * * * * *   |     |
| SpDlg | EEMM Q N S V S - - P T G S L R T S A K R T L F V R T L F D Y D K S R D S G L P S Q G L S F D F G D I I H V T N A S D    | 376 |
| PmDlg | EEMM N S S V S S T T G S L R T S A K R S L Y V R A L F D Y D K T K D S G L P S Q G L S F N Y G D I L H V T N A S D      | 464 |
|       | *** : * * * * * * * * * * * * * * * * * * * * * * * * * * * * * * * * * * * * * * * * * * * * * * * * * * * * * * * *   |     |
| SpDlg | DEW W Q A R H I L P N G E G E G I G I I P S K R R V E R K E K A R L R S V K F S G N K D R N N I Q E P A G T V N S K G   | 436 |
| PmDlg | DEW W Q A K Q V L P T G E E G E M G V I P S K R R V E K R E R A R L K S V K F S G R G G S - - - L E S K G S M N E K R   | 521 |
|       | *** : * * * * * * * * * * * * * * * * * * * * * * * * * * * * * * * * * * * * * * * * * * * * * * * * * * * * * * * *   |     |
| SpDlg | KKGFF-RKF K K N R D S D Q E T S D F E P F T S N A S D S E S S Y R N E E V I L S Y E A V V Q Q E I K Y T R P V I         | 495 |
| PmDlg | KKGFFSRKFKKGRSDLDTS DAEHITSNASDES S Y R N D E M I L S Y E G V V Q Q E V K Y T R P V I                                   | 581 |
|       | *** * * * * * * * * * * * * * * * * * * * * * * * * * * * * * * * * * * * * * * * * * * * * * * * * * * * * * * * *     |     |
| SpDlg | I L G P G K D R I N D D L I S E M P D E F G S C V P H T T R A R P H E V D G R D Y H F V E S R E Q M E K D I Q N H L E   | 555 |
| PmDlg | I L G S G K D R V N D D L I S E M F E K F G S C V P H T T R P R P H E V D K R D Y H F V E S R E Q M E K D I Q D H L E   | 641 |
|       | *** * * * * * * * * * * * * * * * * * * * * * * * * * * * * * * * * * * * * * * * * * * * * * * * * * * * * * * * *     |     |
| SpDlg | I E A G Q Y N E N L Y G T S V A S V K E V S E K G K H C I L D V S G N A I K R L Q V A Q L Y P I A I F L K P K S V E S I | 615 |
| PmDlg | I E A G Q Y N E N L Y G T S V A S V R E V A D K G K H C I L D V S G N A I R R L Q V A N L H P I A I F I R P K S V E S V | 701 |
|       | *** : * * * * * * * * * * * * * * * * * * * * * * * * * * * * * * * * * * * * * * * * * * * * * * * * * * * * * * * *   |     |
| SpDlg | V E M N R R V S E D Q A R K T Y E R A L K L E Q E F L E Y F T A I I L G D T I D D I Y Q Q S K E I I H E Q S G P T I W I | 675 |
| PmDlg | M E M N R R M S R E Q A E K T Y E R A I K L E I E F G E F F T A I I S G D T L D E I Y Y K C K E V I H D Q S G S T I W V | 761 |
|       | : * * * * * * * : * * . * * * * * * * * * * * * * * * * * * * * * * * * * * * * * * * * * * * * * * * * * * * * * *     |     |
| SpDlg | PAKEKL 681                                                                                                              |     |
| PmDlg | PAKDKL 767                                                                                                              |     |
|       | *** : * *                                                                                                               |     |

PDZ  
SH3  
GUK

**Supplemental Figure 8. Sea urchin (SpDlg) and sea star (PmDlg) sequence alignment. Blue, yellow, and green highlights indicate the PDZ, SH3, and GUK domains, respectively.**

Supplemental Figure 9 Sea urchin SpInsc, pencil urchin EtInsc and sea star PmInsc sequence alignment

|        |                                                                           |     |
|--------|---------------------------------------------------------------------------|-----|
| PmInsc | -----MNGFNES-ALAGWLADDVIEHMTDEDSVVRWLQDLRTMTECECMCILQG                    | 49  |
| SpInsc | -----MSDN---KNTESFP-EKKLMQRCDVDSVQQWLIDIRLMPEQECTVVMET                    | 45  |
| EtInsc | MTCLYGVVRTMYGPPAPVICEEKLPTSTSRFQLTEVRSVQQWLSDLQGMMECECN-ILET              | 59  |
|        | * . : . :: : ** : ** * : * * * * : :                                      |     |
| PmInsc | KPIRTSAHDMAKVTSARDNIYILRQRASSISADFAKLYKLDSGSWDQVH-WLCLSLTI                | 108 |
| SpInsc | KPIHNSPLNLENLAATVKE SVYRLQSIKDGFLSLSQIYMCLDLSLQ-----                      | 92  |
| EtInsc | KPIHNSPLNLENVAATKENIYRLRNRAENLARELQQLYHKLTSGTYSQRLRPAVLALTL               | 119 |
|        | ***:. * : : : : : : : * * : . . : : : * * .                               |     |
| PmInsc | RLRFLHECTS YVPTMPLHLFQRQQTVLEECGRLVKHAESFEELNGTLPALPTLNVLSS               | 168 |
| SpInsc | -----SVK--LFIQSLTT                                                        | 103 |
| EtInsc | HVRSCLEECNEYCPDF-LHMKEKQQVVIDAMATLVKNFEMYDNSKGCELD--SLIHSLTS              | 176 |
|        | : : * : :                                                                 |     |
| PmInsc | LGKAFNDLVHMVQGI LIQT VVRSIHESASEYNIKIAINS IHCLSEDDSEIRRLLAKEGAI           | 228 |
| SpInsc | VAKAIKAYLEMVQ GALVVRKLVDMVQGAATELNVKFAVLTVHSLAQDGVWLRRLLIQEDTM            | 163 |
| EtInsc | LGNALNSIRQTVQSALVVRKLVMMIQDSASELNVKFAVITAHSLSQDSIWLRRILIQENAM             | 236 |
|        | : : * : : . ** . * : : * : : * * * : * : * : * . : * * * : * : :          |     |
| PmInsc | QALLQLCQQASL--NAMKPMALKTVANLNCNVAEGRQLELERASGVEYLSEILSSPTATESV            | 286 |
| SpInsc | RALLAICRI TTFSIRSIPTALEIVSILC TEVEGRAELEKVGVGALSEILASPTILEAV              | 223 |
| EtInsc | GALFAVCRI TTLSIPSIVTALQAI STLCAEPEGRVELEKIGGLGFLGELSSPSTSEAV              | 296 |
|        | ** : * : : : : ** : : * * * * * : . * : * * * * * : * : *                 |     |
| PmInsc | KAEAA SVIAQITSPNIDNYHLLGFIEYMEDLLKDLTALSGSASSSSVFIATSAIANIT               | 346 |
| SpInsc | KKEAASVLA EITS PDADIFHRMLCFIEHMEDLLRNLTVLC DQTS SPGVF LVATTAIANIT         | 283 |
| EtInsc | KLEAASVLA EITS PDINSYHRMLCFIEHMEDLLKNLTALCDQTSNPLVFLVSASAIANIT            | 356 |
|        | * * * * * : * : * * * : : * : * * * * * : * * * * * . * * : : : * * * * * |     |
| PmInsc | FMDSMACDC LASFHTARALVKGCNNGMANTLYCKDQVATILANMAVTDQCRKEIMVSGGT             | 406 |
| SpInsc | FMDAMASDY LAEFQTA EVLIQGYLKGKAPSIYSKHQVITIANISCSKSCREQIVSSGGM             | 343 |
| EtInsc | FMDTMSDF LAMFNATILIDGYTSGKAQNMYSKDQVVTIANMSGSEKREQI IKAGGM                | 416 |
|        | *** : * : * * * * * : * : * . * * : * : * * * * * : : * * * * * : * *     |     |
| PmInsc | ELLVDFLHTRALVHPSSAK--KGLKGSGLSGGCSGGKQDVVMSSSCEKVHQKAAIALA                | 463 |
| SpInsc | NILAE LLQGV PSTSRPTSLSRKLSFDGN-----VSLGQMGEESAYEDIYQKAATALG               | 395 |
| EtInsc | KVLVELLHTRAPFTTVKTNQVN---QRA-----DSKAACGMASTCEHVHQKSAIALG                 | 465 |
|        | : * : : : : : : . . . . * : * : * * * * * * *                             |     |
| PmInsc | RLARDQDSAE LILELDAI PRLVELCCNRRERNDSEFVLVACLAALRKLHNLGSPVFKSS             | 523 |
| SpInsc | RLCQDYETCKMAVDLKVVSRLADLCKHARERNHRSDVLVACLAALRRIHSHIGSSPLKEN              | 455 |
| EtInsc | RLCQDHD TAMMAVDLGVIPRLVDMCRHRRERNDSEFVLVACLAALRKLH SVVGASKFEPK            | 525 |
|        | *** : * : : : * : : * * : * : * * * . * * * * * : * : * * : :             |     |
| PmInsc | DVDQLIKPRLIDSYLMCSATK--ESFV                                               | 548 |
| SpInsc | DVEQLIQPRLMESFLHCSTTVRRETFV                                               | 482 |
| EtInsc | ALQQLIRPRLIESFVTCSSIGSTETFV                                               | 552 |
|        | : * * * * * : * : * * : * : *                                             |     |

LBD (LGN-binding domain)

Supplemental Figure 9. Sea urchin (SpInsc), pencil urchin (EtInsc), and sea star (PmInsc) sequence alignment. The blue highlight indicates the LBD domain.
